# Supplementary material
Source: ML conference proceedings conference paper supplement (https://aclanthology.org/2026.americasnlp-6.19)
Supplement: SupplementaryMaterial [file americasnlp_2026_guarani_pipeline.pdf › figures/americasnlp_2026_guarani_pipeline.pdf]

Cultural image (test set)

**Stage 1: VLM Spanish captioning**

Qwen2.5-VL-72B-Instruct (4-bit) or Qwen3-VL-8B  
Prompt: culturally-aware, noun-first style

Spanish caption (1 sentence per image)

**Stage 2: BM25 retrieval + dev exemplar selection**

Retrieve 80 nearest ES→GN pairs from 53K training corpus  
Select 49 dev pairs (leave-one-out) as gold-style examples  
No reranking in frozen config

53K

50 dev

**Stage 3: Many-shot prompt assembly**

System: "translate ES→GN, match example style"  
49 gold dev pairs + 80 retrieved train pairs  
~3–5K tokens per prompt

**Stage 4: Gemini 2.5 Flash translation**

temperature=0.0, thinking=off, max\_tokens=120  
Learns register + vocabulary from in-context examples

**Stage 5: Clean + format**

Strip prefixes, normalize whitespace

**Guaraní caption (submission JSONL)**

Evaluated by chrF++ (stage 1) + human judges (top 5)

Key: mBART replaced by Gemini many-shot ICL (+16 chrF++ gain)
