# Supplementary material
Source: ML conference proceedings conference paper supplement (https://aclanthology.org/2026.americasnlp-6.19)
Supplement: SupplementaryMaterial [file v7_pipeline.pdf › figures/v7_pipeline.pdf]

Cultural image (test set)

**Step 1: VLM Spanish captioning**

Qwen2.5-VL-72B-Instruct (4-bit) or  
Qwen3-VL-8B

Prompt: culturally-aware, noun-first style

Spanish caption (1 sentence per image)

**Step 2: BM25 retrieval**

+ dev exemplar selection

Retrieve  $r$  nearest Es-LoRes pairs

Select  $d$  dev pairs (leave-one-out)

No reranking in frozen config

Training

$R$

Dev

$D$

**Step 3: Many-shot prompt assembly**

System: "translate Es-LoRes, match example style"

$d$  gold dev pairs +  $r$  retrieved train pairs

~3-5K tokens per prompt

**Step 4: Gemini 2.5 Flash translation**

temperature=0.0, thinking=off, max\_tokens=120

Learns register + vocabulary from  
in-context examples

**Step 5: Clean + format**

Strip prefixes, normalize whitespace

**Target language caption  
(submission JSONL)**

Evaluated by chrF++  
+ human judges (top 5)
