# Supplementary material
Source: ML conference proceedings conference paper supplement (https://aclanthology.org/2026.americasnlp-6.19)
Supplement: SupplementaryMaterial [file v11_pipeline.pdf › figures/v11_pipeline.pdf]

Cultural image (test set)

stage 1

**Step 1: VLM Spanish captioning**

Qwen2.5-VL-72B-Instruct (4-bit) or  
Qwen3-VL-8B  
Prompt: culturally-aware, noun-first style

Spanish caption  $q$  (1 sentence per image)

Training

$R$

Dev

$D$

stage 2

**Step 2: BM25 retrieval  
+ dev exemplar selection**

Retrieve  $r$  nearest Es-LoRes pairs  
Select  $d$  dev pairs (leave-one-out)  
No reranking in frozen config

**Step 3: Many-shot prompt assembly**  
System: "translate Es-LoRes, match example style"  
 $d$  gold dev pairs +  $r$  retrieved train pairs  
~3-5K tokens per prompt

**Step 4: Gemini 2.5 Flash translation**  
temperature=0.0, thinking=off, max\_tokens=120  
Learns register + vocabulary from  
in-context examples

**Step 5: Clean + format**  
Strip prefixes, normalize whitespace

**Target language caption  
(submission JSONL)**

Evaluated by chrF++  
+ human judges (top 5)
